# Supplementary figures and images for: Near Me at Home: codesigning the use of video consultations for outpatient appointments in patients’ homes
Source: PubMed Central journal article supplement — BMJ Open Qual. 2020 Aug 27;9(3):e001035. doi: 10.1136/bmjoq-2020-001035 (PMC7454184; doi:10.1136/bmjoq-2020-001035), 2020-08-27

Additional File 1: Process Flow Maps

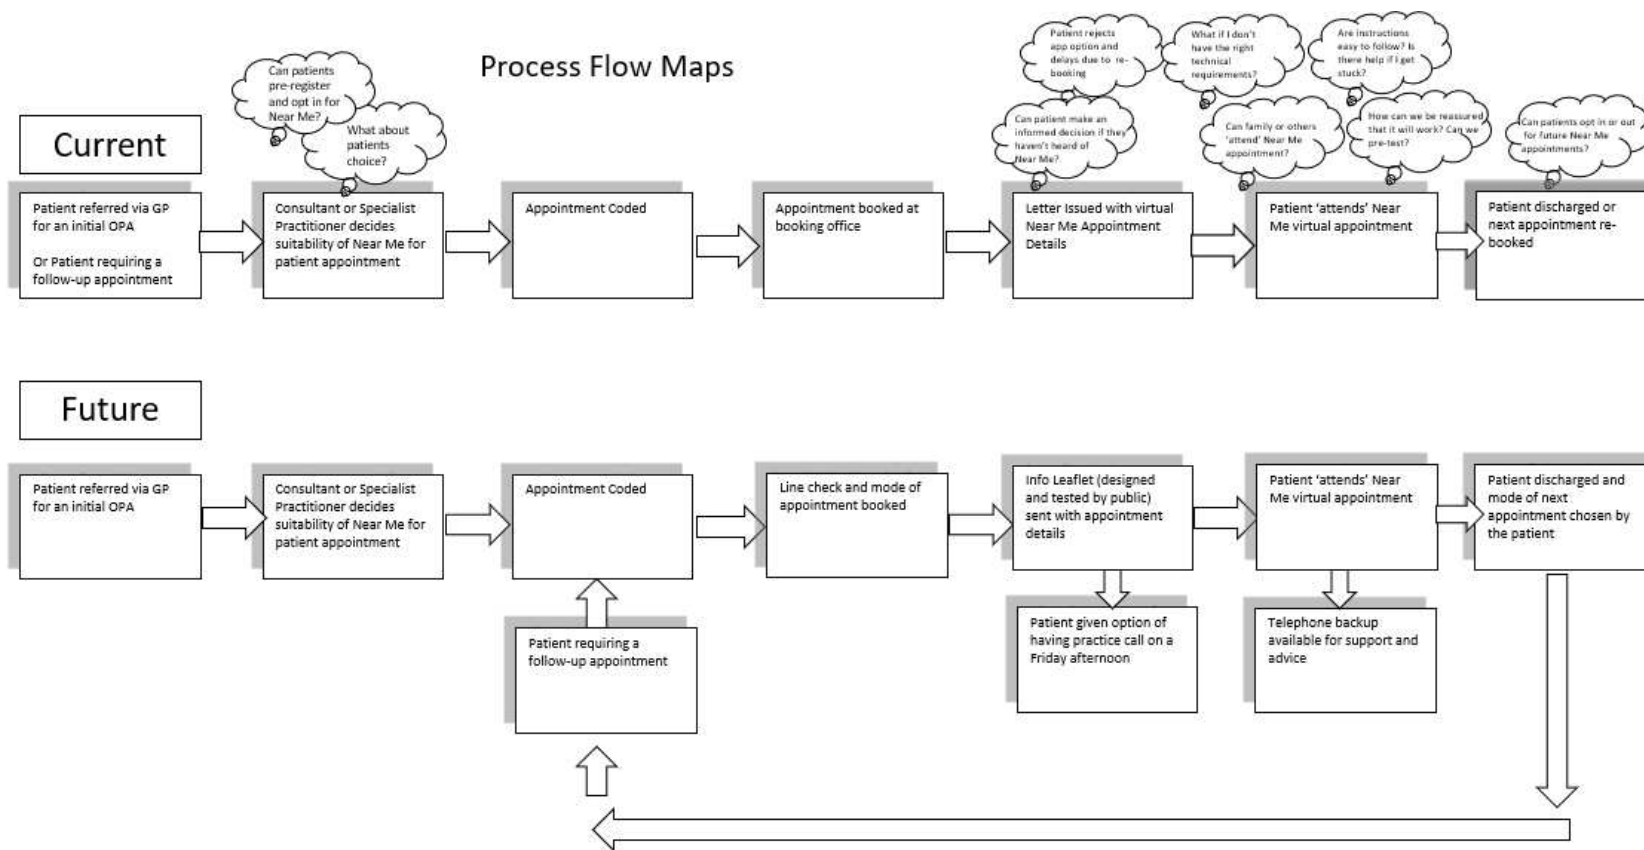

Supplement: bmjoq-2020-001035supp001.pdf [file bmjoq-2020-001035supp001.pdf]
